# Supplementary material for: Nickel (II) and Cobalt (II) Alginate Biopolymers as a “Carry and Release” Platform for Polyhistidine-Tagged Proteins
Source: MDPI journal article supplement (doi:10.3390/gels8020066), 2022-01-18
Supplement: s1 [file s1]

# Nickel (II) and cobalt (II) alginate biopolymers as a “carry and release” platform for polyhistidine-tagged proteins

Andrei-Mihai Dumitrașcu <sup>1</sup>, Iuliana Caraș <sup>1</sup>, Cătălin Țucureanu <sup>1</sup>, Andreea-Laura Ermeneanu <sup>1</sup> and Vlad-Constantin Tofan <sup>1,\*</sup>

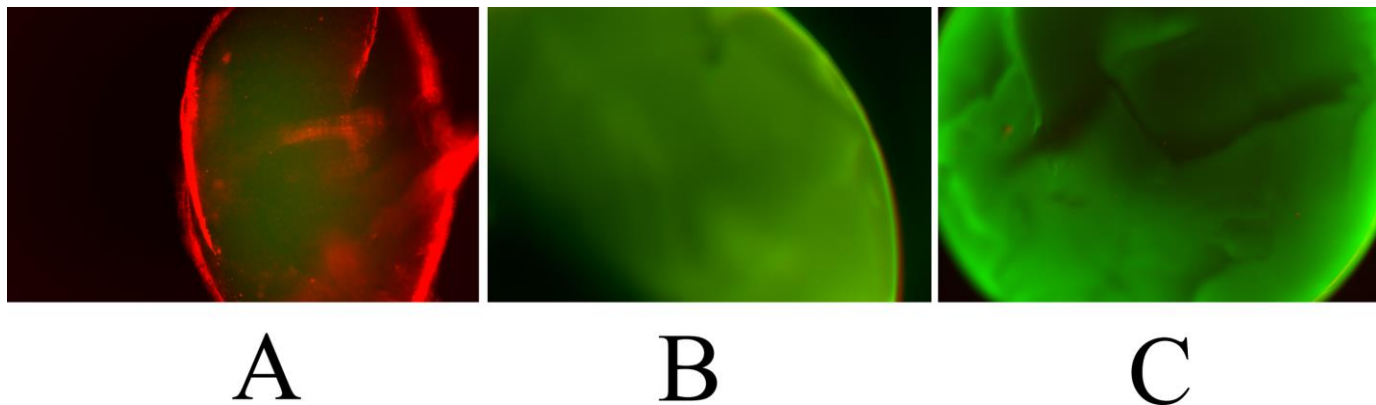

**Figure S1.** Overlapped phase and fluorescence microscopy images of alginate beads. Beads were obtained using an internal gelation method from 5% w/w  $\text{CaCl}_2$ ,  $\text{CoCl}_2$  or  $\text{NiCl}_2$  and 2% sodium alginate. A – calcium alginate; B – cobalt alginate; C – nickel alginate.

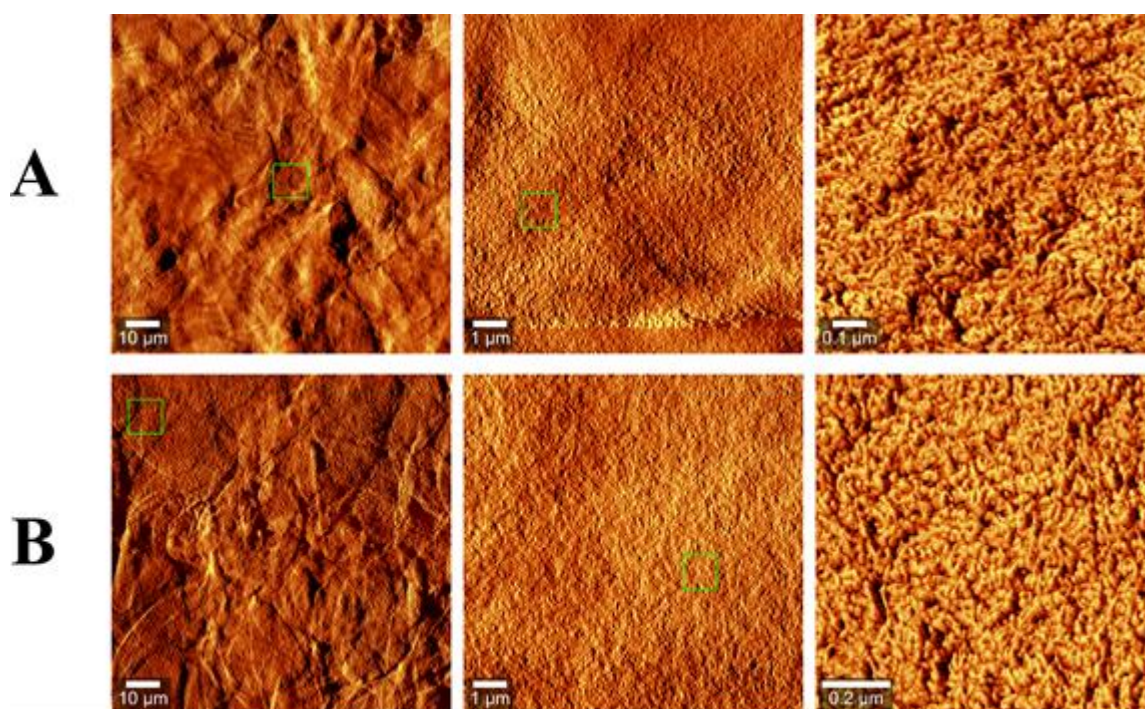

**Figure S2.** AFM surface phase scan of nickel (II) alginate – A and cobalt (II) alginate – B. From left to right: 100  $\mu\text{m} \times 100 \mu\text{m}$ , 10  $\mu\text{m} \times 10 \mu\text{m}$  and 1  $\mu\text{m} \times 1 \mu\text{m}$  scans. Green square represent area scanned at higher resolution.

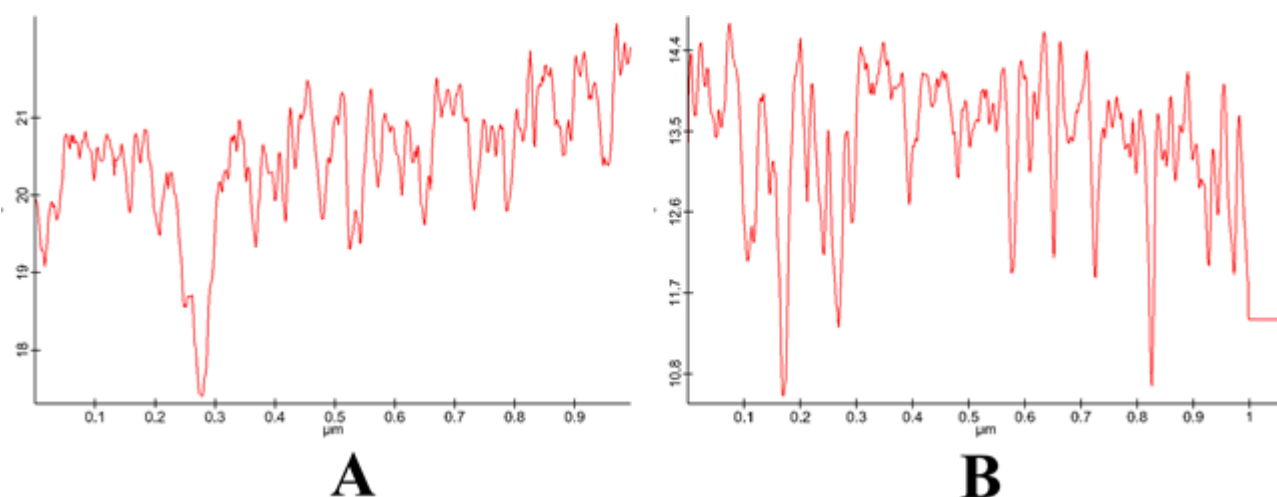

**Figure S3.** AFM surface phase scan crosssection for nickel (II) alginate – A and cobalt (II) alginate – B.

**Table S1.** Gravimetric analysis of calcinated nickel (II) alginate. Samples were heated at 110°C for 1 h and weighted using an analytical balance. Values were calculated by subtracting the crucible's mass. Measurements were done in triplicate. Theoretical mass refers to mass of sodium alginate.

|                           | Mass 1 [mg] | Mass 2 [mg] | Mass 3 [mg] | Average [mg]   | Theoretical mass [mg] |
|---------------------------|-------------|-------------|-------------|----------------|-----------------------|
| Ni <sup>2+</sup> alginate | 17.32       | 16.97       | 17.03       | 17.10 +/- 0.18 | 18                    |

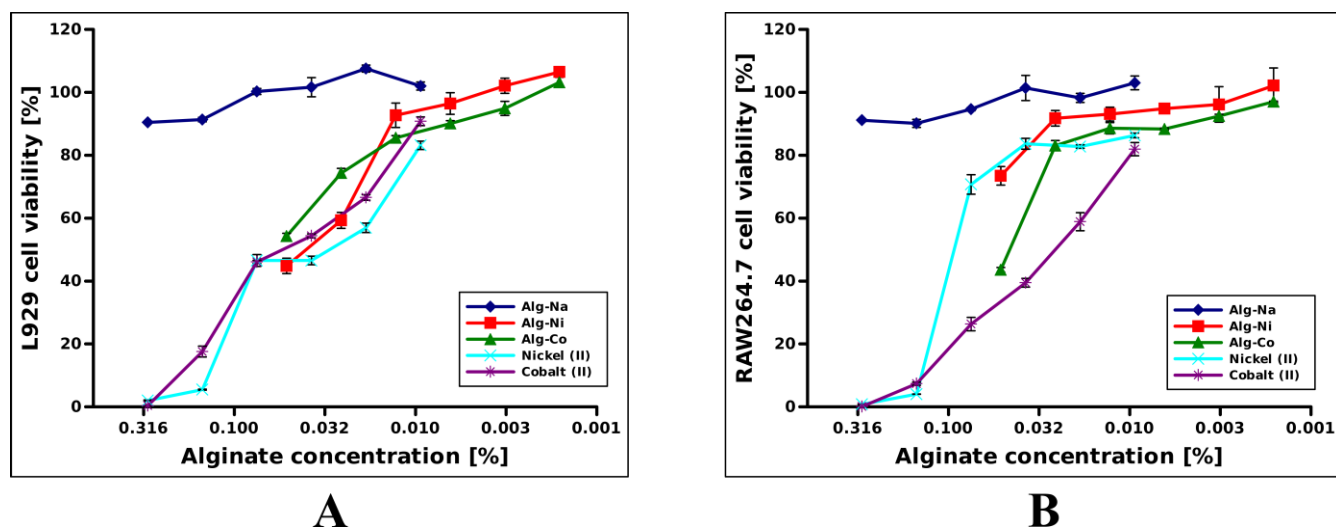

**Figure S4.** Cytotoxicity evaluation of nickel (II) and cobalt (II) alginates on different cell lines. A – L929 cell viability; B – RAW264.7 cell viability. Cell viability values were normalized considering positive control (cells cultured in DMEM alone) as having 100% viability. All samples were in triplicate. Values are represented as mean +/- SEM. X axis is log transformed.

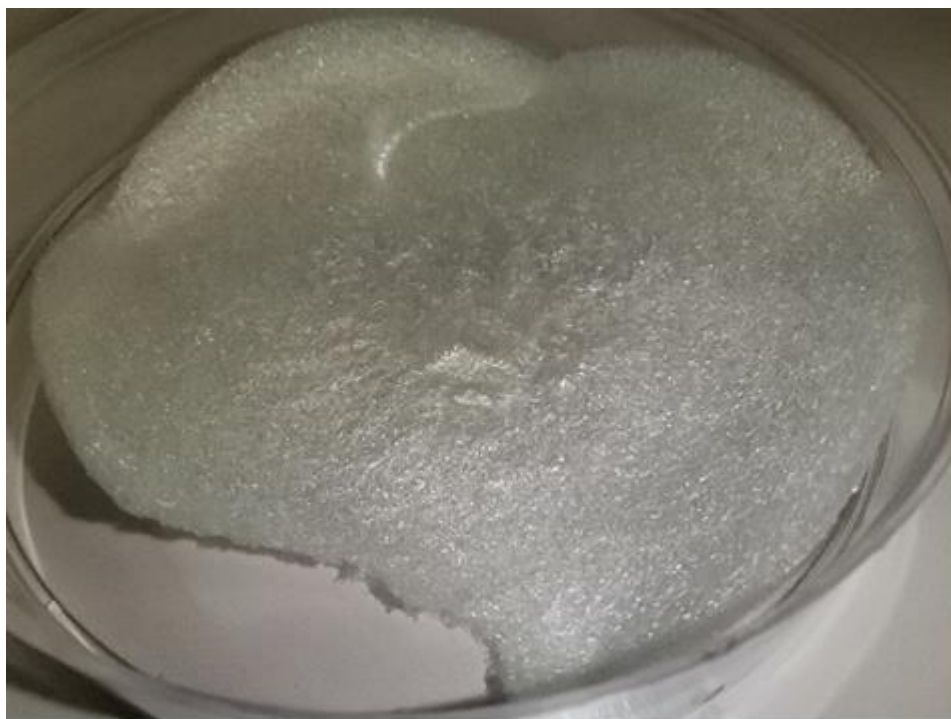

**Figure S5.** Lyophilized nickel (II) alginate sample with immobilized EGFP-HisTAG.
